# Supplementary material for: Crystal chemistry and trace-element behaviour in tourmalines from Minas Gerais, Brazil
Source: Copernicus journal article supplement (doi:10.5194/ejm-37-709-2025), 2025-10-14
Supplement: Supplementary file 4 [file Table S2 - Atomic coordinates, Isotropic temperature factors and occupation factors.docx]

| Table S2: Atomic coordinates, Isotropic temperature factors Uiso (Å²) and occupation factors s.o.f. of the crystallographic sites in the tourmalines from Minas Gerais. | | | | | | | | | | |
| --- | --- | --- | --- | --- | --- | --- | --- | --- | --- | --- |
| Site |  | WR037 | WR044 | WR065 | KM058_R | KM058_V | KM066 | KM076 | KM117 | KM118 |
| X | x  y  z  Uiso  s.o.f. | 0  0  1.0072(4)  0.0242(10)  Na0.934(12) | 0  0  0.6365(4)  0.0226(9)  Na0.802(10) | 0.3333  0.6667  1.3113(6)  0.0232(12)  Na0.660(11) | 0  0  0.6881(6)  0.0255(12)  Na0.646(11) | 0  0  0.1691(7)  0.0215(15)  Na0.718(16) | 0.6667  0.3333  1.0851(6)  0.0216(15)  Na0.658(6) | 0  0  0.6576(5)  0.0267(13)  Na0.915(16) | 0  0  -0.3158(6)  0.0219(14)  Na0.844(17) | 0.6667  0.3333  -0.3673(9)  0.018(2)  Na0.68(2) |
| Y | x  y  z  Uiso  s.o.f. | -0.06201(3)  0.06201(3)  0.39864(12)  0.0079(3)  Fe0.524(3) | -0.12357(7)  -0.06179(3)  1.24120(14)  0.0097(3)  Al0.830(5) | 0.39514(5)  0.60486(5)  0.9112(3)  0.0084(5)  Al0.597(6) | 0.06156(4)  0.12313(8)  0.2882(2)  0.0081(4)  Al0.676(5) | 0.12347(12)  0.06174(6)  0.5664(3)  0.0087(6)  Fe0.342(4) | 0.12129(11)  0.06064(6)  1.1551(2)  0.0107(5)  Fe0.359(3) | 0.06163(4)  0.12326(9)  1.26327(18)  0.0099(4)  Fe0.472(3) | -0.06167(5)  0.06167(5)  0.0822(2)  0.0079(5)  Al0.814(8) | 0.60503(8)  0.21007(17)  0.0342(4)  0.0039(8)  Al0.632(11) |
| Z | x  y  z  Uiso  s.o.f. | -0.03565(5)  0.37012(5)  0.71533(9)  0.00561(15)  Al1.00 | 0.03612(4)  0.40623(4)  0.92761(8)  0.00538(17)  Al0.945(4) | 0.37019(4)  0.40678(5)  0.93467(11)  0.0060(2)  Al0.959(6) | 0.03667(4)  0.29671(4)  0.31253(9)  0.00609(13)  Al1.00 | 0.29694(6)  0.03677(6)  0.54465(13)  0.0051(3)  Fe0.442(3) | 0.29667(5)  0.03683(5)  1.12985(12)  0.00692(19)  Al1.00 | -0.07266(6)  0.29669(6)  0.61517(12)  0.00683(19)  Al1.00 | 0.07297(6)  0.39962(6)  0.072727(12)  0.0053(3)  Al1.00 | 0.63001(7)  0.03658(8)  0.00969(16)  0.0029(4)  Al1.00 |
| B | x  y  z  Uiso  s.o.f. | -0.2187(3)  -0.10933(13)  0.2254(5)  0.0067(6)  B1.00 | -0.10930(11)  0.10930(11)  1.4169(4)  0.0101(9)  B1.00 | 0.22432(13)  0.4486(3)  1.0907(5)  0.0102(11)  B1.00 | -0.10905(11)  0.10905(11)  0.4686(4)  0.0067(5)  B1.00 | 0.10938(17)  -0.10938(17)  0.3886(7)  0.0093(8)  B1.00 | 0.10907(15)  0.2181(3)  0.9741(5)  0.0080(7)  B1.00 | -0.10927(16)  0.10927(16)  0.4382(6)  0.0067(7)  B1.00 | 0.10898(15)  0.2180(3)  -0.0951(6)  0.0125(13)  B1.00 | 0.4494(4)  0.2247(2)  -0.1460(7)  0.011(2)  B1.00 |
| T | x  y  z  Uiso  s.o.f. | -0.00201(4)  0.18997(4)  0.77059(8)  0.00466(14)  Si1.00 | 0.00205(4)  0.19198(3)  0.87147(7)  0.00398(16)  Si1.00 | 0.52325(4)  0.66458(4)  0.54503(9)  0.0044(2)  Si1.00 | 0.00211(4)  0.19193(3)  -0.07797(8)  0.00539(12)  Si1.00 | 0.47678(5)  0.14137(5)  0.26775(11)  0.0048(3)  Si1.00 | 0.47680(5)  0.14145(5)  0.85335(10)  0.0050(2)  Si1.00 | 0.00205(5)  0.19199(5)  0.89237(11)  0.00617(18)  Si1.00 | -0.00206(5)  0.18986(5)  0.45054(11)  0.0038(2)  Si1.00 | 0.47677(7)  0.14134(7)  0.40024(15)  0.0008(4)  Si1.00 |
| O1 | x  y  z  Uiso  s.o.f. | 0  0  0.5546(7)  0.0428(16)  O1.00 | 0  0  1.0888(6)  0.0364(11)  O1.00 | 0.3333  0.6667  0.7612(7)  0.0318(12)  O1.00 | 0  0  0.1424(6)  0.0262(9)  O1.00 | 0  0  0.7169(9)  0.0342(16)  O1.00 | 0  0  1.3020(8)  0.0267(12)  O1.00 | 0  0  1.1102(9)  0.0374(17)  O1.00 | 0  0  0.2312(8)  0.0300(15)  O1.00 | 0.6667  0.3333  0.1820(11)  0.028(2)  O1.00 |
| O2 | x  y  z  Uiso  s.o.f. | -0.12239(18)  -0.06119(9)  0.2550(4)  0.0173(6)  O1.00 | -0.06068(7)  0.06068(7)  1.3850(3)  0.0188(5)  O1.00 | 0.27307(9)  0.54614(18)  1.0564(4)  0.0185(6)  O1.00 | 0.12073(15)  0.06036(7)  0.4333(3)  0.0149(5)  O1.00 | 0.06045(12)  -0.06045(12)  0.4213(5)  0.0193(8)  O1.00 | 0.06065(10)  0.1213(2)  1.0084(4)  0.0164(6)  O1.00 | -0.06086(11)  0.06086(11)  0.4073(5)  0.0178(7)  O1.00 | 0.60542(12)  0.1208(2)  -0.0619(4)  0.0147(7)  O1.00 | 0.5466(3)  0.27330(15)  -0.1118(6)  0.0121(10)  O1.00 |
| O3 | x  y  z  Uiso  s.o.f. | -0.06460(18)  0.46770(9)  0.6128(3)  0.0097(4)  O1.00 | 0.06629(16)  0.53315(8)  1.0304(3)  0.0140(4)  O1.00 | 0.46642(10)  0.53358(10)  1.0377(3)  0.0136(5)  O1.00 | 0.13236(9)  0.26472(17)  0.4159(3)  0.0126(4)  O1.00 | 0.2664(3)  0.13319(13)  0.4412(4)  0.0149(7)  O1.00 | 0.2653(2)  0.13263(12)  1.0272(4)  0.0134(6)  O1.00 | -0.19965(12)  0.19965(12)  0.7182(4)  0.0122(6)  O1.00 | 0.20041(12)  0.4008(2)  0.6249(4)  0.0107(6)  O1.00 | 0.53363(17)  0.0673(3)  -0.0931(5)  0.0095(9)  O1.00 |
| O4 | x  y  z  Uiso  s.o.f. | 0.09315(9)  0.18630(18)  0.8417(3)  0.0086(4)  O1.00 | -0.09345(7)  0.09345(7)  0.7993(3)  0.0113(4)  O1.00 | 0.52048(18)  0.76024(9)  0.4721(3)  0.0108(5)  O1.00 | -0.09379(8)  0.09379(8)  -0.1507(3)  0.0096(4)  O1.00 | 0.4796(2)  0.23982(12)  0.3402(4)  0.0121(6)  O1.00 | 0.4789(2)  0.23945(11)  0.9263(4)  0.0097(5)  O1.00 | -0.09349(11)  0.09349(11)  0.8205(4)  0.0101(6)  O1.00 | 0.09366(11)  0.1873(2)  0.5226(4)  0.0074(6)  O1.00 | 0.4794(3)  0.23969(15)  0.4717(6)  0.0065(8)  O1.00 |
| O5 | x  y  z  Uiso  s.o.f. | -0.09330(9)  0.09330(9)  0.8637(3)  0.0082(4)  O1.00 | 0.09342(7)  0.18684(15)  0.7772(3)  0.0112(4)  O1.00 | 0.42683(9)  0.57317(9)  0.4499(3)  0.0113(5)  O1.00 | 0.09380(8)  0.18759(15)  -0.1732(3)  0.0095(4)  O1.00 | 0.57312(12)  0.1462(2)  0.3617(4)  0.0123(6)  O1.00 | 0.57300(10)  0.1460(2)  0.9486(4)  0.0093(5)  O1.00 | 0.09347(11)  0.1869(2)  0.7979(4)  0.0100(6)  O1.00 | -0.09333(11)  0.09333(11)  0.5452(4)  0.0083(6)  O1.00 | 0.57342(16)  0.1468(3)  0.4945(5)  0.0070(8)  O1.00 |
| O6 | x  y  z  Uiso  s.o.f. | -0.01023(12)  0.18720(11)  0.5461(2)  0.0077(3)  O1.00 | 0.01026(10)  0.19625(9)  1.0962(2)  0.0103(3)  O1.00 | 0.51867(11)  0.65638(11)  0.7702(3)  0.0102(4)  O1.00 | 0.01045(10)  0.19532(9)  0.1478(2)  0.0083(3)  O1.00 | 0.38069(14)  0.04742(15)  0.3467(3)  0.0102(4)  O1.00 | 0.65635(14)  0.13793(13)  0.6276(3)  0.0169(6)  O1.00 | 0.01024(14)  0.19670(14)  1.1167(3)  0.0096(4)  O1.00 | -0.01028(4)  0.18563(14)  0.2254(3)  0.0071(4)  O1.00 | 0.48136(18)  0.13809(18)  0.1754(4)  0.0059(6)  O1.00 |
| O7 | x  y  z  Uiso  s.o.f. | 0.00028(11)  0.28589(10)  0.8510(2)  0.0068(3)  O1.00 | -0.00013(9)  0.28590(9)  0.79191(18)  0.0096(3)  O1.00 | 0.61945(10)  0.66657(11)  0.4657(2)  0.0090(3)  O1.00 | 0.00022(10)  0.28645(9)  -0.15612(19)  0.0075(2)  O1.00 | 0.48106(15)  0.13743(15)  0.0426(3)  0.0114(5)  O1.00 | 0.38057(12)  0.04704(13)  0.9320(2)  0.0077(3)  O1.00 | -0.00020(14)  0.28579(14)  0.8126(3)  0.0085(4)  O1.00 | 0.00003(15)  0.28622(13)  0.5290(3)  0.0059(4)  O1.00 | 0.38062(17)  0.04698(19)  0.4781(3)  0.0050(6)  O1.00 |
| O8 | x  y  z  Uiso  s.o.f. | -0.12355(12)  0.27283(11)  0.5453(2)  0.0078(3)  O1.00 | 0.12379(10)  0.39667(10)  1.09791(18)  0.0101(3)  O1.00 | 0.45718(12)  0.39358(11)  0.7719(2)  0.0101(4)  O1.00 | -0.06042(10)  0.20935(10)  0.48322(19)  0.0081(3)  O1.00 | 0.20951(16)  -0.06057(15)  0.3739(3)  0.0110(5)  O1.00 | 0.39658(14)  0.12399(14)  1.2927(2)  0.0089(4)  O1.00 | -0.06066(14)  0.20957(14)  0.4516(3)  0.0087(4)  O1.00 | 0.06228(15)  0.45711(15)  0.5569(3)  0.0062(4)  O1.00 | 0.54280(19)  -0.06382(19)  0.1729(4)  0.0051(6)  O1.00 |

| Supplementary material 2: Continued. | | | | | | | | | |
| --- | --- | --- | --- | --- | --- | --- | --- | --- | --- |
| Site |  | KM119 | KM120 | KM132 | KF081 | WR045 | KM075 | U13757 | U20662 |
| X | x  y  z  Uiso  s.o.f. | 0  0  0,6317(6)  0,0247(14)  Na0,679(12) | 0.6667  0.3333  0,6235(5)  0,0207(11)  Na0,682(11) | 0.6667  0.3333  1,528(2)  0,027(5)  Na0,42(3) | 0.6667  0.3333  -0,2217(7)  0,0276(16)  Na0,618(12) | 0.6667  0.3333  0,6053(4)  0,0174(8)  Na0,971(11) | 0  0  1,0556(5)  0,0250(13)  Na0,957(16) | 0.6667  0.3333  0.3607(5)  0.0190(12)  Na0.704(12) | 0  0  1,6361(4)  0,0226(9)  Na0,829(9) |
| Y | x  y  z  Uiso  s.o.f. | -0,06152(5)  0,06152(5)  0,0316(2)  0,0084(5)  Al0,709(6) | 0,60512(5)  0,39488(5)  1,0245(2)  0,0084(5)  Al0,664(5) | 0,54264(9)  0,27132(5)  1,13162(18)  0,0073(4)  Fe0,733(7) | 0,60530(5)  0,21060(10)  0,1805(2)  0,0089(5)  Al0,686(6) | 0,60483(3)  0,20966(6)  0,00219(13)  0,0096(3)  Fe0,531(3) | 0,06197(4)  0,12394(8)  0,66258(16)  0,0070(4)  Fe0,511(3) | 0.60523(5)  0.39477(5)  0.7619(2)  0.0067(5)  Al0.655(7) | 0,06182(3)  0,12363(7)  1,24200(14)  0,0098(3)  Al0,860(5) |
| Z | x  y  z  Uiso  s.o.f. | -0,03666(5)  0,26013(5)  0,00712(10)  0,0056(2)  Al0,992(5) | 0,40671(4)  0,37008(4)  0,99980(9)  0,00592(14)  Al1,00 | 0,26123(10)  0,29798(10)  0,81425(19)  0,0045(3)  Al1,00 | 0,62995(5)  0,03666(5)  0,15452(11)  0,0065(2)  Al0,986(5) | 0,29648(5)  -0,07246(5)  0,31728(10)  0,0060(2)  Al0,988(4) | 0,03568(6)  0,40571(7)  0,34634(12)  0,0055(2)  Al1,00 | 0.74003(5)  0.70326(5)  0.40364(10)  0.0044(2)  Al1.00 | 0,03680(4)  0,29730(4)  1,26125(8)  0,00565(17)  Al0,943(4) |
| B | x  y  z  Uiso  s.o.f. | -0,2181(3)  -0,10904(13)  -0,1488(5)  0,0066(6)  B1,00 | 0,44225(12)  0,55775(12)  1,1776(4)  0,0110(10)  B1,00 | 0,2204(6)  0,1102(3)  0,9694(10)  0,004(2)  B1,00 | 0,77550(14)  0,22450(14)  -0,0012(5)  0,0110(12)  B1,00 | 0,77630(13)  0,22370(13)  -0,1728(5)  0,0078(6)  B1,00 | -0,10946(17)  0,10946(17)  0,8360(6)  0,0067(8)  B1,00 | 0.77542(13)  0.5508(3)  0.5812(4)  0.0109(12)  B1.00 | -0,10937(12)  0,10937(12)  1,4169(4)  0,0085(9)  B1,00 |
| T | x  y  z  Uiso  s.o.f. | -0,00208(4)  0,18981(4)  0,39782(9)  0,00540(17)  Si1,00 | 0,33121(4)  0,47475(4)  0,72348(8)  0,00495(13)  Si1,00 | 0,47474(8)  0,33126(9)  0,75728(19)  0,0048(3)  Si1,00 | 0,47692(4)  0,14150(4)  0,54554(10)  0,00682(18)  Si1,00 | 0,47663(4)  0,14137(4)  0,37220(9)  0,00600(16)  Si1,00 | 0,00199(5)  0,19198(5)  0,29077(11)  0,0025(3)  Si1,00 | 0.52529(4)  0.66874(4)  0.46059(9)  0.00330(17)  Si1.00 | 0,00203(4)  0,19196(3)  0,87189(7)  0,00444(16)  Si1,00 |
| O1 | x  y  z  Uiso  s.o.f. | 0  0  0,1765(7)  0,0249(11)  O1,00 | 0.6667  0.3333  1,1710(6)  0,0267(10)  O1,00 | 0.6667  0.3333  0,9789(15)  0,033(3)  O1,00 | 0.6667  0.3333  0,3233(7)  0,0230(10)  O1,00 | 0.6667  0.3333  0,1561(7)  0,0480(19)  O1,00 | 0  0  0,5081(9)  0,050(3)  O1,00 | 0.6667  0.3333  0.9092(6)  0.0261(11)  O1.00 | 0  0  1,0887(6)  0,0376(11)  O1,00 |
| O2 | x  y  z  Uiso  s.o.f. | -0,12066(18)  -0,06033(9)  -0,1129(4)  0,0146(6)  O1,00 | 0,72694(8)  0,45387(16)  0,8789(3)  0,0147(5)  O1,00 | 0,60486(18)  0,39514(18)  1,2675(8)  0,0154(11)  O1,00 | 0,72694(9)  0,27306(9)  0,0357(4)  0,0150(6)  O1,00 | 0,72790(9)  0,27210(9)  -0,1453(4)  0,0173(6)  O1,00 | -0,06107(12)  0,06107(12)  0,8059(5)  0,0173(8)  O1,00 | 0.72683(9)  0.45366(19)  0.6158(3)  0.0137(6)  O1.00 | -0,06071(8)  0,06071(8)  1,3865(3)  0,0197(5)  O1,00 |
| O3 | x  y  z  Uiso  s.o.f. | -0,13208(10)  0,13208(10)  -0,0956(3)  0,0121(5)  O1,00 | 0,53413(9)  0,46587(9)  0,8973(3)  0,0127(5)  O1,00 | 0,1337(2)  0,2674(4)  0,9152(7)  0,0119(10)  O1,00 | 0,53498(10)  0,0700(2)  0,0515(3)  0,0140(6)  O1,00 | 0,19905(9)  -0,19905(9)  0,2146(3)  0,0117(5)  O1,00 | 0,0646(2)  0,53232(12)  0,4493(4)  0,0099(6)  O1,00 | 0.53391(10)  0.46609(10)  0.6343(3)  0.0105(5)  O1.00 | 0,13362(8)  0,26724(16)  1,3643(3)  0,0144(5)  O1,00 |
| O4 | x  y  z  Uiso  s.o.f. | 0,09396(9)  0,18792(18)  0,4709(3)  0,0094(5)  O1,00 | 0,42701(8)  0,57299(8)  0,7965(3)  0,0089(4)  O1,00 | 0,57299(18)  0,42701(18)  0,6891(7)  0,0093(9)  O1,00 | 0,47858(19)  0,23929(9)  0,6193(4)  0,0101(5)  O1,00 | 0,48120(17)  0,24060(9)  0,4436(3)  0,0105(5)  O1,00 | -0,09323(12)  0,09323(12)  0,2197(4)  0,0082(6)  O1,00 | 0.42695(9)  0.57305(9)  0.5330(3)  0.0071(5)  O1.00 | -0,09346(8)  0,09346(8)  0,7997(3)  0,0114(4)  O1,00 |
| O5 | x  y  z  Uiso  s.o.f. | -0,09381(9)  0,09381(9)  0,4940(4)  0,0101(5)  O1,00 | 0,23979(8)  0,47958(17)  0,8190(3)  0,0095(4)  O1,00 | 0,4785(4)  0,23925(18)  0,6659(7)  0,0090(9)  O1,00 | 0,57282(10)  0,14563(19)  0,6417(4)  0,0120(5)  O1,00 | 0,57360(8)  0,14719(17)  0,4654(3)  0,0097(5)  O1,00 | 0,09325(12)  0,1865(2)  0,1975(4)  0,0085(6)  O1,00 | 0.52038(19)  0.76019(9)  0.5555(3)  0.0077(5)  O1.00 | 0,09341(7)  0,18683(15)  0,7779(3)  0,0116(4)  O1,00 |
| O6 | x  y  z  Uiso  s.o.f. | -0,01052(12)  0,18476(11)  0,1723(3)  0,0087(3)  O1,00 | 0,32292(10)  0,47128(10)  0,4982(2)  0,0080(3)  O1,00 | 0,4689(2)  0,3229(2)  0,9817(5)  0,0080(7)  O1,00 | 0,48227(12)  0,13829(12)  0,3198(3)  0,0096(4)  O1,00 | 0,47938(11)  0,13623(11)  0,1481(3)  0,0092(3)  O1,00 | 0,01030(15)  0,19737(14)  0,5152(3)  0,0078(4)  O1,00 | 0.52868(11)  0.67685(11)  0.2355(3)  0.0067(3)  O1.00 | 0,01022(10)  0,19641(9)  1,0969(2)  0,0109(3)  O1,00 |
| O7 | x  y  z  Uiso  s.o.f. | -0,00022(12)  0,28632(10)  0,4762(2)  0,0075(3)  O1,00 | 0,33315(10)  0,38035(10)  0,80209(19)  0,0073(3)  O1,00 | 0,3813(2)  0,3341(2)  0,6782(5)  0,0078(6)  O1,00 | 0,38036(11)  0,04663(12)  0,6238(2)  0,0087(3)  O1,00 | 0,38088(10)  0,04781(11)  0,4526(2)  0,0083(3)  O1,00 | -0,00025(15)  0,28579(15)  0,2105(3)  0,0069(4)  O1,00 | 61962(11)  0.66684(11)  0.5391(2)  0.0055(3)  O1.00 | -0,00003(10)  0,28600(9)  0,79221(18)  0,0099(3)  O1,00 |
| O8 | x  y  z  Uiso  s.o.f. | 0,06047(11)  0,26992(12)  -0,1633(2)  0,0079(3)  O1,00 | 0,39368(10)  0,45715(11)  1,16288(19)  0,0077(3)  O1,00 | 0,2706(2)  0,2097(2)  0,9838(5)  0,0086(7)  O1,00 | 0,72710(12)  0,12379(12)  -0,0160(2)  0,0089(4)  O1,00 | 0,39403(11)  -0,06293(12)  0,1471(2)  0,0094(3)  O1,00 | -0,06316(16)  0,39386(15)  0,1831(3)  0,0074(4)  O1,00 | 0.72704(11)  0.60314(11)  0.5667(2)  0.0064(3)  O1.00 | -0,06051(10)  0,20957(10)  1,43178(17)  0,0107(3)  O1,00 |
