# Supplementary material for: Crystal chemistry and trace-element behaviour in tourmalines from Minas Gerais, Brazil
Source: Copernicus journal article supplement (doi:10.5194/ejm-37-709-2025), 2025-10-14
Supplement: Supplementary file 7 [file Table S3 - Anisotropic temperature factors.docx]

| Table S3: Anisotropic temperature factors (Å²) of the crystallographic sites in tourmalines from Minas Gerais. | | | | | | | | | | | | |
| --- | --- | --- | --- | --- | --- | --- | --- | --- | --- | --- | --- | --- |
| Site | U11 | U22 | U33 | U13 | U23 | U12 | U11 | U22 | U33 | U13 | U23 | U12 |
|  | WR037 | | | | | | WR044 | | | | | |
| X  Y  Z  B  T  O1  O2  O3  O4  O5  O6  O7  O8 | 0.0271(12)  0.0064(4)  0.0059(3)  0.0076(15)  0.0042(2)  0.063(3)  0.0085(11)  0.0172(12)  0.0069(8)  0.0054(7)  0.0103(7)  0.0087(7)  0.0071(7) | 0.0271(12)  0.0064(4)  0.0055(3)  0.0086(11)  0.0043(3)  0.063(3)  0.0261(11)  0.0080(8)  0.0122(11)  0.0054(7)  0.0073(7)  0.0070(7)  0.0061(7) | 0.0183(16)  0.0097(5)  0.0046(3)  0.0036(14)  0.0052(3)  0.003(2)  0.0115(12)  0.0068(10)  0.0083(10)  0.0086(10)  0.0066(7)  0.0057(6)  0.0076(7) | 0.0000  -0.00060(15)  -0.0005(2)  0.0005(6)  0.0000(2)  0.0000  0.0000(4)  -0.0002(4)  -0.0004(9)  0.0008(4)  -0.0009(6)  -0.0011(6)  -0.0017(5) | 0.0000  0.00060(15)  -0.0002(2)  0.0010(11)  -0.00025(17)  0.0000  0.0001(9)  -0.0004(9)  -0.0002(4)  -0.0008(4)  -0.0008(6)  -0.0020(5)  0.0006(6) | 0.0135(6)  0.0022(3)  0.0022(3)  0.0038(7)  0.0020(2)  0.0313(13)  0.0042(6)  0.0086(6)  0.0061(6)  -0.0012(8)  0.0053(6)  0.0046(6)  0.0013(6) | 0.0256(11)  0.0094(5)  0.0054(3)  0.0120(12)  0.0035(2)  0.0505(17)  0.0255(9)  0.0239(11)  0.0101(7)  0.0095(6)  0.0127(7)  0.0113(6)  0.0090(6) | 0.0256(11)  0.0079(4)  0.0061(3)  0.0120(12)  0.0038(3)  0.0505(17)  0.0255(9)  0.0128(7)  0.0101(7)  0.0155(10)  0.0107(6)  0.0088(6)  0.0118(7) | 0.0166(14)  0.0125(5)  0.0051(2)  0.0062(15)  0.0048(3)  0.0082(17)  0.0154(10)  0.0091(10)  0.0108(9)  0.0107(9)  0.0082(6)  0.0094(6)  0.0104(6) | 0.0000  -0.00102(17)  0.00029(19)  0.0001(5)  -0.00008(18)  0.0000  -0.0004(4)  -0.0005(4)  0.0002(4)  -0.0011(7)  0.0006(5)  -0.0009(5)  0.0029(5) | 0.0000  -0.0020(3)  -0.00033(19)  -0.0001(5)  -0.00028(16)  0.0000  0.0004(4)  -0.0011(8)  -0.0002(4)  -0.0006(4)  -0.0007(5)  -0.0014(5)  0.0005(5) | 0.0128(5)  0.0047(3)  0.0032(2)  0.0058(12)  0.0019(2)  0.0252(9)  0.0204(10)  0.0119(5)  0.0029(7)  0.0077(5)  0.0065(5)  0.0055(5)  0.0058(5) |
|  | WR065 | | | | | | KM058_R | | | | | |
| X  Y  Z  B  T  O1  O2  O3  O4  O5  O6  O7  O8 | 0.0242(15)  0.0062(6)  0.0053(3)  0.0110(15)  0.0036(3)  0.0431(19)  0.0242(11)  0.0114(8)  0.0141(11)  0.0092(7)  0.0106(7)  0.0086(7)  0.0082(7) | 0.0242(15)  0.0062(6)  0.0068(3)  0.0102(18)  0.0038(3)  0.0431(19)  0.0097(11)  0.0114(8)  0.0086(8)  0.0092(7)  0.0126(7)  0.0104(7)  0.0089(7) | 0.021(2)  0.0118(9)  0.0063(3)  0.0091(19)  0.0058(3)  0.009(2)  0.0166(14)  0.0086(12)  0.0114(11)  0.0110(11)  0.0088(8)  0.0091(7)  0.0115(8) | 0.0000  -0.0007(3)  0.0004(2)  -0.0010(12)  0.00039(19)  0.0000  0.0004(10)  -0.0008(5)  0.0003(5)  0.0008(4)  0.0008(6)  0.0013(6)  -0.0020(6) | 0.0000  0.0007(3)  0.0007(2)  -0.0005(6)  0.0003(2)  0.0000  0.0002(5)  0.0008(5)  0.0005(9)  -0.0008(4)  0.0008(6)  0.0011(6)  0.0011(6) | 0.0121(8)  0.0022(6)  0.0032(2)  0.0051(9)  0.0017(2)  0.0215(9)  0.0048(5)  -0.0014(9)  0.0070(5)  0.0012(8)  0.0070(6)  0.0056(6)  0.0029(6) | 0.0258(15)  0.0065(5)  0.0062(2)  0.0071(9)  0.0052(2)  0.0352(15)  0.0077(9)  0.0107(7)  0.0085(6)  0.0077(6)  0.0105(6)  0.0089(6)  0.0067(6) | 0.0258(15)  0.0075(6)  0.0063(3)  0.0071(9)  0.0055(2)  0.0352(15)  0.0199(8)  0.0256(12)  0.0085(6)  0.0138(10)  0.0078(6)  0.0070(6)  0.0067(6) | 0.025(2)  0.0106(7)  0.0049(3)  0.0055(14)  0.0055(2)  0.0080(19)  0.0129(12)  0.0066(10)  0.0083(9)  0.0092(10)  0.0063(7)  0.0068(6)  0.0088(7) | 0.0000  0.0018(4)  0.0002(2)  0.0002(5)  -0.00013(18)  0.0000  0.0003(4)  0.0016(8)  0.0000(4)  -0.0011(7)  0.0003(5)  -0.0006(5)  -0.0008(5) | 0.0000  0.0009(2)  0.0006(2)  -0.0002(5)  -0.00043(16)  0.0000  0.0007(8)  0.0008(4)  0.0000(4)  -0.0005(4)  -0.0009(5)  -0.0016(4)  0.0019(5) | 0.0129(7)  0.0037(3)  0.0025(2)  0.0034(11)  0.00281(19)  0.0176(7)  0.0039(5)  0.0128(6)  0.0017(7)  0.0069(5)  0.0043(5)  0.0042(5)  0.0019(5) |
|  | KM058_V | | | | | | KM066 | | | | | |
| X  Y  Z  B  T  O1  O2  O3  O4  O5  O6  O7  O8 | 0.0234(19)  0.0081(9)  0.0051(4)  0.0099(15)  0.0045(4)  0.047(3)  0.0252(14)  0.0264(18)  0.0156(15)  0.0111(10)  0.0100(10)  0.0116(10)  0.0103(10) | 0.0234(19)  0.0063(7)  0.0050(4)  0.0099(15)  0.0048(4)  0.047(3)  0.0252(14)  0.0140(11)  0.0118(11)  0.0175(16)  0.0095(10)  0.0116(10)  0.0098(10) | 0.018(3)  0.0123(10)  0.0045(4)  0.009(2)  0.0053(4)  0.008(3)  0.0183(18)  0.0085(15)  0.0104(14)  0.0104(15)  0.0100(10)  0.0102(10)  0.0112(11) | 0.0000  -0.0010(3)  -0.0004(3)  -0.0008(8)  -0.0001(3)  0.0000  -0.0002(6)  -0.0009(6)  -0.0004(6)  -0.0018(11)  -0.0011(8)  0.0017(8)  -0.0024(8) | 0.0000  -0.0021(6)  -0.0001(3)  0.0008(8)  0.0003(3)  0.0000  0.0002(6)  -0.0018(12)  -0.0009(12)  -0.0009(6)  0.0002(8)  0.0016(8)  -0.0001(8) | 0.0117(9)  0.0040(4)  0.0020(3)  0.0053(17)  0.0025(3)  0.0237(13)  0.0207(15)  0.0132(9)  0.0078(8)  0.0088(8)  0.0041(8)  0.0053(8)  0.0038(8) | 0.0237(18)  0.0113(8)  0.0073(4)  0.0096(13)  0.0052(4)  0.034(2)  0.0240(12)  0.0244(15)  0.0143(13)  0.0078(8)  0.0190(10)  0.0084(8)  0.0119(9) | 0.0237(18)  0.0088(6)  0.0075(4)  0.0095(18)  0.0052(4)  0.034(2)  0.0097(13)  0.0124(10)  0.0088(9)  0.0139(13)  0.0173(10)  0.0072(8)  0.0082(8) | 0.017(2)  0.0128(9)  0.0051(3)  0.0048(18)  0.0045(3)  0.012(2)  0.0108(14)  0.0075(13)  0.0078(11)  0.0082(12)  0.0141(9)  0.0060(8)  0.0074(8) | 0.0000  -0.0017(3)  -0.0006(3)  -0.0016(14)  -0.0001(2)  0.0000  -0.0005(11)  -0.0010(5)  -0.0002(5)  -0.0014(10)  0.0000(7)  -0.0007(7)  -0.0005(7) | 0.0000  -0.0034(5)  -0.0001(3)  -0.0008(7)  0.0003(2)  0.0000  -0.0003(5)  -0.0020(11)  -0.0004(10)  -0.0007(5)  -0.0014(7)  0.0002(7)  -0.0035(6) | 0.0118(9)  0.0056(4)  0.0031(3)  0.0048(9)  0.0026(3)  0.0171(10)  0.0049(7)  0.0122(8)  0.0072(7)  0.0069(7)  0.0090(8)  0.0027(7)  0.0057(7) |

| Supplementary material 3: Continued. | | | | | | | | | | | | |
| --- | --- | --- | --- | --- | --- | --- | --- | --- | --- | --- | --- | --- |
| Site | U11 | U22 | U33 | U13 | U23 | U12 | U11 | U22 | U33 | U13 | U23 | U12 |
|  | KM076 | | | | | | KM117 | | | | | |
| X  Y  Z  B  T  O1  O2  O3  O4  O5  O6  O7  O8 | 0.0295(16)  0.0076(5)  0.0076(4)  0.0070(13)  0.0056(3)  0.053(3)  0.0252(14)  0.0097(9)  0.0077(10)  0.0084(9)  0.0116(9)  0.0077(10)  0.0071(9) | 0.0295(16)  0.0088(6)  0.0063(4)  0.0070(13)  0.0059(4)  0.053(3)  0.0252(14)  0.0097(9)  0.0077(10)  0.0138(14)  0.0084(9)  0.0077(10)  0.0069(9) | 0.021(2)  0.0135(7)  0.0067(4)  0.0062(19)  0.0070(4)  0.006(3)  0.0142(16)  0.0084(14)  0.0117(13)  0.0095(14)  0.0092(10)  0.0117(13)  0.0096(9) | 0.0000  0.0020(4)  -0.0006(3)  -0.0004(7)  -0.0001(2)  0.0000  0.0002(5)  -0.0007(6)  0.0001(5)  -0.0020(10)  0.0001(7)  0.0001(5)  -0.0011(7) | 0.0000  0.0010(2)  -0.0003(3)  0.0004(7)  -0.0004(2)  0.0000  -0.0002(5)  0.0007(6)  -0.0001(5)  -0.0010(5)  -0.0008(7)  -0.0001(5)  0.0016(7) | 0.0147(8)  0.0044(3)  0.0036(3)  0.0035(16)  0.0028(3)  0.0265(14)  0.0211(14)  -0.0018(11)  0.0015(10)  0.0069(7)  0.0054(8)  0.0015(10)  0.0016(7) | 0.0235(17)  0.0058(6)  0.0062(4)  0.0136(17)  0.0034(3)  0.043(3)  0.0203(13)  0.0085(10)  0.0054(10)  0.0060(9)  0.0084(9)  0.0078(9)  0.0071(10) | 0.0235(17)  0.0058(6)  0.0057(4)  0.012(2)  0.0036(4)  0.043(3)  0.0077(14)  0.0238(17)  0.0099(14)  0.0060(9)  0.0090(10)  0.0054(9)  0.0046(9) | 0.019(2)  0.0113(8)  0.0044(4)  0.011(2)  0.0043(4)  0.004(2)  0.0121(16)  0.0048(13)  0.0083(13)  0.0086(13)  0.0056(9)  0.0054(9)  0.0079(9) | 0.0000  -0.0011(3)  0.0004(3)  0.0006(14)  -0.0002(2)  0.0000  -0.0013(11)  0.0009(11)  -0.0004(11)  0.0007(5)  -0.0005(7)  -0.0013(8)  -0.0006(7) | 0.0000  0.0011(3)  -0.0004(3)  0.0003(7)  -0.0001(2)  0.0000  -0.0006(6)  0.0004(6)  -0.0002(5)  -0.0007(5)  -0.0011(7)  -0.0021(7)  -0.0025(7) | 0.0118(8)  0.0024(6)  0.0033(3)  0.0061(10)  0.0018(3)  0.0214(13)  0.0038(7)  0.0119(9)  0.0049(7)  -0.0004(11)  0.0056(8)  0.0039(8)  0.0038(7) |
|  | KM18 | | | | | | KM119 | | | | | |
| X  Y  Z  B  T  O1  O2  O3  O4  O5  O6  O7  O8 | 0.018(2)  0.0015(10)  0.0029(5)  0.011(3)  0.0003(5)  0.040(3)  0.0075(19)  0.0076(13)  0.0090(19)  0.0052(12)  0.0082(13)  0.0031(12)  0.0025(12) | 0.018(2)  0.0018(13)  0.0027(5)  0.009(2)  0.0003(6)  0.040(3)  0.0172(18)  0.023(2)  0.0040(13)  0.0126(19)  0.0048(12)  0.0046(13)  0.0053(13) | 0.017(4)  0.0083(14)  0.0024(5)  0.012(3)  0.0019(5)  0.005(3)  0.008(2)  0.0032(18)  0.0082(17)  0.0058(18)  0.0038(12)  0.0061(12)  0.0074(12) | 0.0000  0.0015(8)  0.0009(4)  -0.0007(10)  -0.0005(3)  0.0000  -0.0009(7)  0.0013(15)  0.0003(7)  -0.0013(14)  0.0003(9)  -0.0005(10)  0.0021(9) | 0.0000  0.0007(4)  0.0008(4)  -0.0015(19)  0.0003(3)  0.0000  -0.0019(15)  0.0007(7)  0.0006(14)  -0.0006(7)  0.0017(9)  0.0014(10)  0.0015(9) | 0.0089(12)  0.0009(6)  0.0009(4)  0.0056(14)  0.0002(4)  0.0199(16)  0.0038(9)  0.0114(12)  0.0045(9)  0.0063(9)  0.0026(10)  0.0011(10)  0.0019(9) | 0.0257(17)  0.0071(6)  0.0057(3)  0.0067(15)  0.0053(3)  0.0332(17)  0.0079(11)  0.0103(8)  0.0073(8)  0.0081(8)  0.0107(8)  0.0094(7)  0.0061(7) | 0.0257(17)  0.0071(6)  0.0067(3)  0.0079(11)  0.0051(3)  0.0332(17)  0.0196(10)  0.0103(8)  0.0131(12)  0.0081(8)  0.0100(8)  0.0078(7)  0.0097(8) | 0.023(3)  0.0103(8)  0.0042(3)  0.0049(16)  0.0055(3)  0.008(2)  0.0123(14)  0.0051(12)  0.0098(11)  0.0094(12)  0.0067(8)  0.0061(8)  0.0093(8) | 0.0000  -0.0010(2)  0.0002(2)  0.0001(6)  -0.0004(2)  0.0000  -0.0001(5)  -0.0014(5)  -0.0009(9)  0.0009(5)  -0.0012(6)  -0.0012(6)  0.0028(6) | 0.0000  0.0010(2)  0.0007(2)  0.0001(12)  -0.0002(2)  0.0000  -0.0002(9)  0.0014(5)  -0.0004(5)  -0.0009(5)  -0.0014(6)  -0.0014(6)  0.0020(6) | 0.0128(8)  0.0029(5)  0.0031(3)  0.0034(8)  0.0024(2)  0.0166(8)  0.0039(6)  -0.0030(10)  0.0065(6)  0.0005(9)  0.0062(6)  0.0050(6)  0.0049(6) |
|  | KM120 | | | | | | KM132 | | | | | |
| X  Y  Z  B  T  O1  O2  O3  O4  O5  O6  O7  O8 | 0.0214(14)  0.0067(6)  0.0069(3)  0.0125(13)  0.0044(2)  0.0370(17)  0.0198(9)  0.0104(7)  0.0069(7)  0.0072(7)  0.0104(7)  0.0083(6)  0.0062(7) | 0.0214(14)  0.0067(6)  0.0062(3)  0.0125(13)  0.0049(3)  0.0370(17)  0.0085(10)  0.0104(7)  0.0069(7)  0.0150(11)  0.0077(6)  0.0066(7)  0.0062(6) | 0.019(2)  0.0110(8)  0.0051(3)  0.0091(18)  0.0058(3)  0.006(2)  0.0122(12)  0.0068(11)  0.0093(10)  0.0087(10)  0.0062(7)  0.0070(7)  0.0092(7) | 0.0000  -0.0012(2)  -0.0005(2)  0.0002(5)  0.00023(19)  0.0000  0.0002(8)  -0.0009(4)  0.0002(4)  -0.0021(8)  -0.0001(5)  -0.0007(5)  -0.0008(5) | 0.0000  0.0012(2)  -0.0003(2)  -0.0002(5)  -0.00012(17)  0.0000  0.0001(4)  0.0009(4)  -0.0002(4)  -0.0010(4)  -0.0006(5)  -0.0016(5)  0.0018(5) | 0.0107(7)  0.0026(5)  0.0036(2)  0.0070(13)  0.0025(2)  0.0185(8)  0.0042(5)  -0.0028(9)  0.0008(8)  0.0075(5)  0.0047(6)  0.0038(6)  0.0019(5) | 0.030(6)  0.0066(7)  0.0052(6)  0.006(4)  0.0047(6)  0.047(4)  0.025(2)  0.0120(17)  0.0081(16)  0.014(2)  0.0078(15)  0.0061(15)  0.0115(17) | 0.030(6)  0.0050(5)  0.0041(6)  0.006(3)  0.0047(5)  0.047(4)  0.025(2)  0.022(3)  0.0081(16)  0.0062(14)  0.0102(15)  0.0093(15)  0.0067(15) | 0.022(9)  0.0108(8)  0.0040(6)  0.000(3)  0.0054(6)  0.004(5)  0.009(3)  0.005(2)  0.009(2)  0.010(2)  0.0055(16)  0.0093(15)  0.0092(16) | 0.0000  -0.0009(2)  0.0002(5)  -0.0007(12)  0.0004(4)  0.0000  0.0005(9)  0.0002(19)  0.0006(9)  0.0007(9)  0.0004(12)  0.0006(11)  -0.0005(12) | 0.0000  -0.0017(4)  -0.0004(5)  -0.001(2)  0.0003(4)  0.0000  -0.0005(9)  0.0001(9)  -0.0006(9)  0.0014(17)  -0.0011(12)  -0.0001(12)  -0.0020(12) | 0.015(3)  0.0033(3)  0.0022(5)  0.0029(18)  0.0026(5)  0.024(2)  0.022(2)  0.0110(13)  0.0018(18)  0.0068(12)  0.0042(13)  0.0050(13)  0.0058(13) |

| Supplementary material 3: Continued. | | | | | | | | | | | | |
| --- | --- | --- | --- | --- | --- | --- | --- | --- | --- | --- | --- | --- |
| Site | U11 | U22 | U33 | U13 | U23 | U12 | U11 | U22 | U33 | U13 | U23 | U12 |
|  | KF081 | | | | | | WR045 | | | | | |
| X  Y  Z  B  T  O1  O2  O3  O4  O5  O6  O7  O8 | 0.0263(19)  0.0068(6)  0.0061(4)  0.0124(16)  0.0058(3)  0.0317(17)  0.0181(10)  0.0108(9)  0.0138(12)  0.0095(8)  0.0099(8)  0.0083(8)  0.0065(8) | 0.0263(19)  0.0081(8)  0.0057(4)  0.0124(16)  0.0057(3)  0.0317(17)  0.0181(10)  0.0251(15)  0.0088(9)  0.0170(13)  0.0091(8)  0.0076(8)  0.0065(7) | 0.030(3)  0.0124(9)  0.0070(3)  0.008(2)  0.0089(3)  0.006(2)  0.0152(15)  0.0110(14)  0.0092(12)  0.0121(13)  0.0086(9)  0.0090(8)  0.0108(9) | 0.0000  0.0021(5)  -0.0001(3)  0.0003(6)  0.0001(2)  0.0000  -0.0005(5)  0.0023(10)  -0.0002(5)  -0.0034(10)  -0.0003(6)  -0.0013(6)  0.0006(6) | 0.0000  0.0011(3)  0.0007(3)  -0.0003(6)  0.0003(2)  0.0000  0.0005(5)  0.0012(5)  -0.0004(9)  -0.0017(5)  0.0007(6)  -0.0005(7)  0.0022(6) | 0.0131(10)  0.0041(4)  0.0024(3)  0.0062(16)  0.0029(2)  0.0158(8)  0.0137(11)  0.0125(7)  0.0069(6)  0.0085(6)  0.0038(6)  0.0032(6)  0.0011(6) | 0.0189(10)  0.0077(4)  0.0056(3)  0.0099(12)  0.0055(3)  0.063(3)  0.0244(11)  0.0093(8)  0.0142(12)  0.0071(7)  0.0092(7)  0.0079(7)  0.0075(7) | 0.0189(10)  0.0101(5)  0.0071(3)  0.0099(12)  0.0058(3)  0.063(3)  0.0244(11)  0.0093(8)  0.0081(8)  0.0144(11)  0.0085(7)  0.0076(7)  0.0109(8) | 0.0143(14)  0.0120(5)  0.0054(3)  0.0058(16)  0.0067(3)  0.017(3)  0.0148(13)  0.0099(11)  0.0113(11)  0.0102(11)  0.0073(8)  0.0079(7)  0.0103(8) | 0.0000  0.0025(3)  0.0003(2)  0.0008(6)  0.0000(2)  0.0000  -0.0005(5)  0.0000(5)  0.0000(5)  -0.0010(9)  0.0000(6)  -0.0004(6)  0.0026(6) | 0.0000  0.00127(15)  0.0005(2)  -0.0008(6)  0.0002(2)  0.0000  0.0005(5)  0.0000(5)  0.0000(9)  -0.0005(4)  0.0013(6)  0.0005(6)  0.0020(6) | 0.0095(5)  0.0051(2)  0.0031(3)  0.0066(14)  0.0028(2)  0.0317(14)  0.0209(11)  -0.0004(9)  0.0071(6)  0.0072(6)  0.0025(6)  0.0027(6)  0.0050(6) |
|  | KM075 | | | | | | U13757 | | | | | |
| X  Y  Z  B  T  O1  O2  O3  O4  O5  O6  O7  O8 | 0.0277(16)  0.0052(5)  0.0054(4)  0.0085(15)  0.0018(4)  0.070(4)  0.0271(16)  0.0173(16)  0.0060(10)  0.0060(9)  0.0110(10)  0.0088(9)  0.0100(10) | 0.0277(16)  0.0064(6)  0.0063(4)  0.0085(15)  0.0020(4)  0.070(4)  0.0271(16)  0.0080(10)  0.0060(10)  0.0137(15)  0.0063(10)  0.0064(10)  0.0051(9) | 0.020(2)  0.0099(6)  0.0054(4)  0.0046(19)  0.0037(4)  0.011(3)  0.0101(15)  0.0074(14)  0.0089(13)  0.0082(13)  0.0066(10)  0.0062(9)  0.0083(9) | 0.0000  0.0014(4)  0.0003(3)  0.0001(7)  -0.0004(3)  0.0000  0.0004(6)  0.0003(6)  -0.0002(5)  -0.0021(11)  -0.0005(7)  -0.0008(7)  -0.0016(7) | 0.0000  0.00072(19)  -0.0003(3)  -0.0001(7)  -0.0005(2)  0.0000  -0.0004(6)  0.0005(11)  0.0002(5)  -0.0011(5)  -0.0008(7)  -0.0021(7)  -0.0026(7) | 0.0138(8)  0.0032(3)  0.0033(3)  0.0053(18)  0.0009(3)  0.035(2)  0.0228(17)  0.0087(8)  0.0004(11)  0.0069(8)  0.0047(8)  0.0044(9)  0.0046(9) | 0.0205(15)  0.0056(6)  0.0057(3)  0.0118(15)  0.0032(3)  0.0365(18)  0.0196(10)  0.0091(8)  0.0060(8)  0.0136(11)  0.0059(7)  0.0054(7)  0.0049(7) | 0.0205(15)  0.0056(6)  0.0048(3)  0.0115(17)  0.0033(3)  0.0365(18)  0.0088(12)  0.0091(8)  0.0060(8)  0.0057(7)  0.0095(7)  0.0068(7)  0.0078(8) | 0.016(2)  0.0086(8)  0.0030(3)  0.0094(18)  0.0033(3)  0.0054(19)  0.0092(12)  0.0037(11)  0.0061(10)  0.0065(10)  0.0041(7)  0.0047(7)  0.0072(7) | 0.0000  -0.0010(2)  0.0007(2)  0.0006(11)  0.00038(17)  0.0000  0.0008(9)  -0.0008(4)  -0.0001(4)  0.0007(4)  0.0012(5)  0.0013(5)  0.0022(5) | 0.0000  0.0010(2)  -0.0002(2)  0.0003(6)  0.0002(2)  0.0000  0.0004(4)  0.0008(4)  0.0001(4)  0.0013(8)  0.0002(5)  -0.0002(6)  0.0013(5) | 0.0102(7)  0.0027(6)  0.0030(3)  0.0058(9)  0.0016(2)  0.0183(9)  0.0044(6)  -0.0028(9)  0.0005(8)  0.0068(6)  0.0034(6)  0.0034(6)  0.0036(6) |
|  | U20662 | | | | | |  | | | | | |
| X  Y  Z  B  T  O1  O2  O3  O4  O5  O6  O7  O8 | 0.0255(11)  0.0078(4)  0.0051(3)  0.0098(12)  0.0039(2)  0.0535(18)  0.0273(10)  0.0123(8)  0.0101(7)  0.0107(7)  0.0137(7)  0.0116(6)  0.0101(7) | 0.0255(11)  0.0098(5)  0.0057(3)  0.0098(12)  0.0045(3)  0.0535(18)  0.0273(10)  0.0231(11)  0.0101(7)  0.0163(10)  0.0106(6)  0.0094(7)  0.0101(6) | 0.0167(14)  0.0126(5)  0.0055(3)  0.0052(15)  0.0050(3)  0.0059(18)  0.0157(11)  0.0114(10)  0.0107(9)  0.0097(9)  0.0091(6)  0.0098(6)  0.0102(6) | 0.0000  0.0019(3)  0.0005(2)  -0.0001(5)  -0.00003(18)  0.0000  -0.0008(4)  0.0015(8)  0.0000(4)  -0.0014(7)  0.0004(5)  -0.0007(5)  -0.0005(5) | 0.0000  0.00093(17)  0.0007(2)  0.0001(5)  -0.00040(17)  0.0000  0.0008(4)  0.0008(4)  0.0000(4)  -0.0007(4)  -0.0009(5)  -0.0013(5)  0.0027(5) | 0.0128(5)  0.0049(2)  0.0022(2)  0.0044(12)  0.0022(2)  0.0268(9)  0.0220(10)  0.0115(6)  0.0027(8)  0.0081(5)  0.0066(6)  0.0059(6)  0.0039(5) |  |  |  |  |  |  |
