# Supplementary material for: Crystal chemistry and trace-element behaviour in tourmalines from Minas Gerais, Brazil
Source: Copernicus journal article supplement (doi:10.5194/ejm-37-709-2025), 2025-10-14
Supplement: Supplementary file [file ejm-37-709-2025-supplement-title-page.pdf › ejm-37-709-2025-supplement-title-page.pdf]

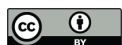

*Supplement of*

**Crystal chemistry and trace-element behaviour in tourmalines from Minas Gerais, Brazil**

**Florent Bomal et al.**

*Correspondence to:* Florent Bomal ([florent.bomal@doct.uliege.be](mailto:florent.bomal@doct.uliege.be))

- [ejm-37-709-2025-supplement-title-page.pdf](#)
- [Table S1-Calculation of ASP-NEW.docx](#)
- [Table S2 - Atomic coordinates, Isotropic temperature factors and occupation factors.docx](#)
- [Table S3 - Anisotropic temperature factors.docx](#)
- [Table S4 - Bond length distances and interatomic angles.docx](#)

The copyright of individual parts of the supplement might differ from the article licence.
